# Supplementary material
Source: HighWire-hosted journal article supplement (https://jitc.bmj.com/content/10/11/e005970)
Supplement: inline-supplementary-material-1 [file inline-supplementary-material-1.pdf]

## **Supplementary Methods**

### **Evaluation of immunotherapy efficacy and adverse events**

The treatment response was assessed by computed tomography (CT) scans. The development of adverse events was assessed by electrocardiography and blood indicators.

### **Evaluation of the influence of mutations on gene functions**

The protein structure was predicted by SWISS-MODEL (<https://swissmodel.expasy.org>) and Phyre2 (<http://www.sbg.bio.ic.ac.uk/phyre2/>) based on the amino acid sequence derived from UniProt (<https://www.uniprot.org>). These inferred structures along with mutation information were further subjected to a functional prediction by the MAESTRO ([https://pbwww.services.came.sbg.ac.at/?page\\_id=416](https://pbwww.services.came.sbg.ac.at/?page_id=416)) algorithm.

### **Public Data collection**

The gene expression profile consisting of 74 cases whose T cells were either extracted before or after ICI treatment were available from the Gene Expression Omnibus (GEO, <https://www.ncbi.nlm.nih.gov/geo>, GSE141479).
